# Supplementary material
Source: PubMed Central journal article supplement (PMC5653340)
Supplement: Supp_Fig1.pdf [file Supp_Fig1.pdf]

## Supplementary Data

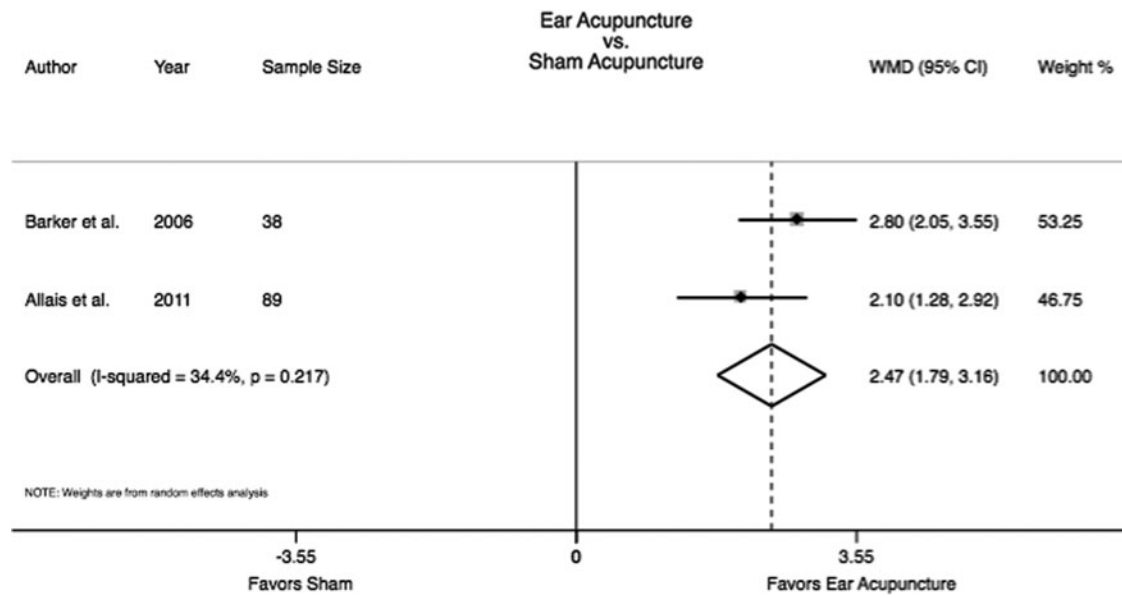

**SUPPLEMENTARY FIG. S1.** Forest plot of ear acupuncture versus sham with calculated weighted mean difference (WMD) for pain score difference on a pain score out of 10 (PS-10). CI, confidence interval.
