# Supplementary material
Source: PubMed Central journal article supplement (PMC5653340)
Supplement: Supp_Fig2.pdf [file Supp_Fig2.pdf]

**Acupuncture as an Adjunct to Standard Analgesia Care  
vs.  
Standard Analgesia Care**

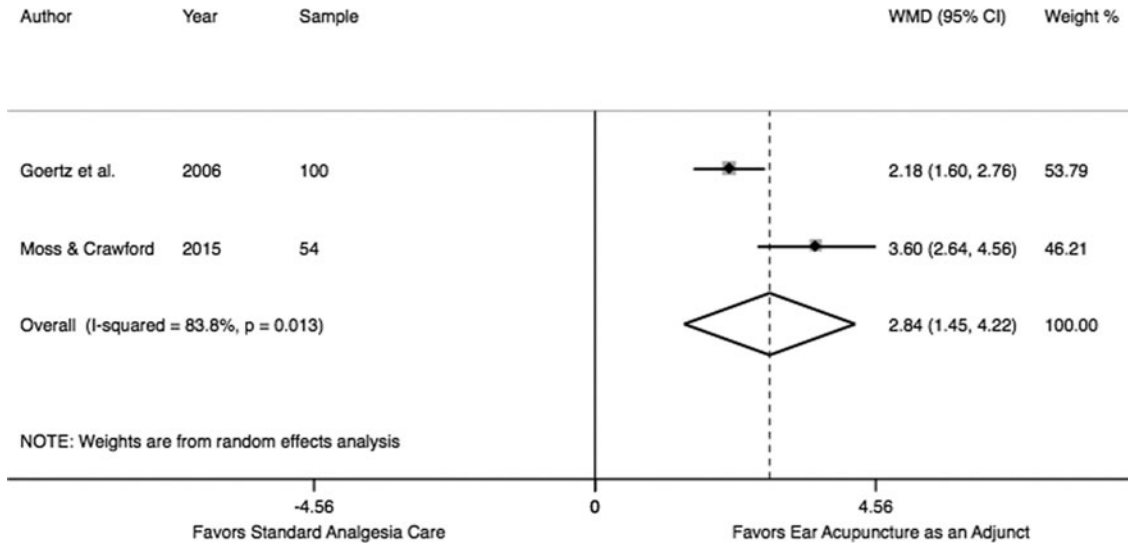

**SUPPLEMENTARY FIG. S2.** Forest plot of ear acupuncture versus standard analgesia care with calculated weighted mean difference (WMD) for pain score difference on a pain score out of 10 (PS-10). CI, confidence interval.
